# Supplementary material
Source: publisher figshare collection journal article supplement (https://acs.figshare.com/ndownloader/files/4660378)
Supplement: Supplementary file 1 [file 4660378]

# Differentiation of Gas Molecules Using Flexible and All-Carbon Nanotube Devices

*Dongliang Fu<sup>1</sup>, Hueiling Lim<sup>1</sup>, Yumeng Shi<sup>1</sup>, Xiaochen Dong<sup>1</sup>, S. G. Mhaisalkar<sup>1</sup>, Yuan Chen<sup>2</sup>, Shabbir Moochhala<sup>3</sup> and Lain-Jong Li<sup>1\*</sup>*

<sup>1</sup>School of Materials Science and Engineering, Nanyang Technological University 50, Nanyang Ave.

Singapore, 637819

<sup>2</sup> School of Chemical and Biomedical Engineering, Nanyang Technological University, Singapore 637459

<sup>3</sup>DSO National Laboratories, 20 Science Park Drive, Singapore 118230, Singapore

## Figure summary:

Figure S1. (a) Typical electrical characteristics including transfer curves and  $I_d - V_d$  relations for an all-P2-SWNT transistor. (b) Transfer curves showing that an all-P2-SWNT transistor is *p*-doped (or threshold voltage positively shifted) upon exposure to NO from N<sub>2</sub>.

Figure S2. Typical electrical characteristics,  $I_d$  vs.  $V_g$  and  $I_d$  vs.  $V_d$  for an all-P3-SWNT resistor. The resistance of the resistor is 0.51M $\Omega$ .

Figure S3. Sensing curves for the Au-contacted resistor showing that the device is normally insensitive to CO exposure (measured at  $V_d = 10V$ ).

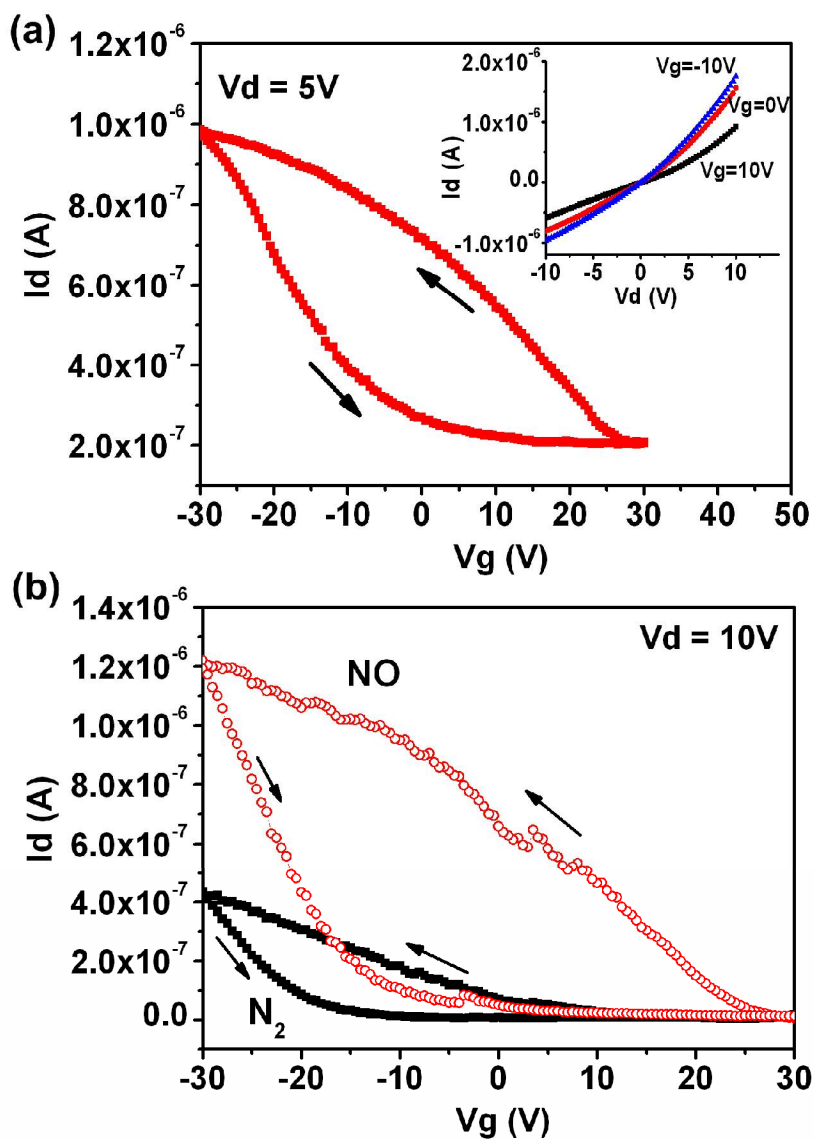

Figure S1. (a) Typical electrical characteristics including transfer curves and  $I_d - V_d$  relations for an all-P2-SWNT transistor. (b) Transfer curves showing that an all-P2-SWNT transistor is *p*-doped (or threshold voltage positively shifted) upon exposure to NO from  $N_2$ .

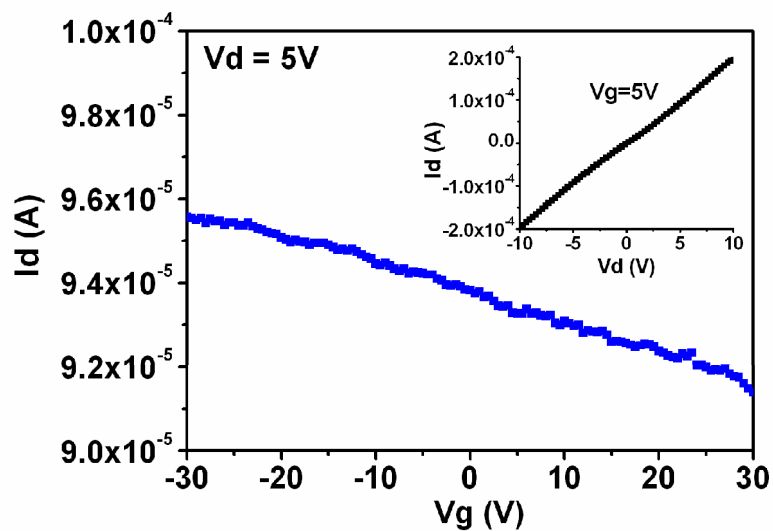

Figure S2. Typical electrical characteristics,  $I_d$  vs.  $V_g$  and  $I_d$  vs.  $V_d$  for an all-P3-SWNT resistor. The resistance of the resistor is  $0.51\text{M}\Omega$ .

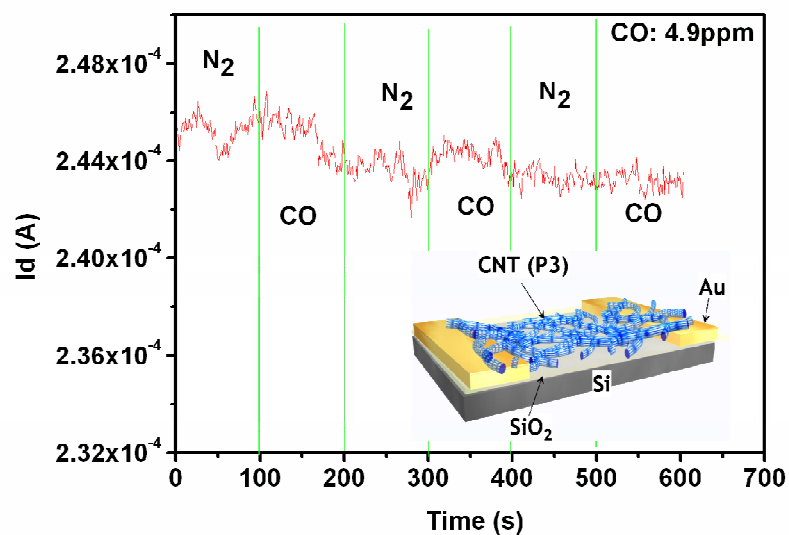

Figure S3. Sensing curves for the Au-contacted resistor showing that the device is insensitive to CO exposure (measured at  $V_d = 10\text{V}$ ).
